# Supplementary material
Source: Springer Nature journal article supplement (https://www.springermedizin.de/resource/supplementary/12879_2011_1636_MOESM2_ESM.pdf/9442968)

**A**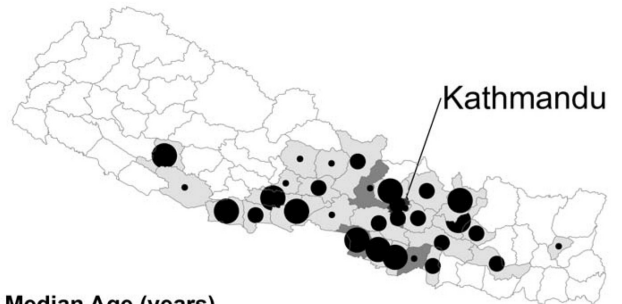**Median Age (years)**

- 0.00 - 4.00
- 5.00 - 9.00
- 10.00 - 13.00

0 75 150 300 Kilometers

**All AES patients of suspected viral aetiology**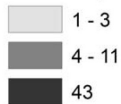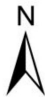**B**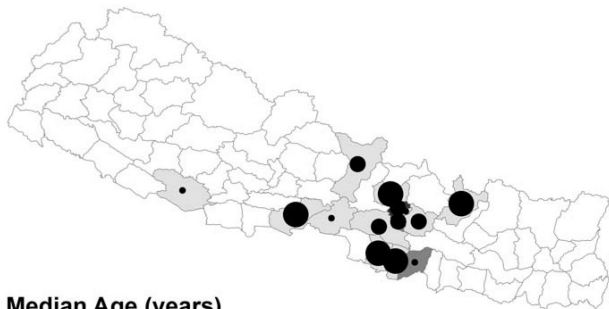**Median Age (years)**

- 2.50 - 4.50
- 6.00 - 7.00
- 10.00 - 13.00

**JE**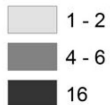

Supplement: MOESM2 [file 9442968]
